# Supplementary material for: Seasonal soil health dynamics in soy-wheat relay intercropping
Source: PubMed Central journal article supplement (PMC11333471; doi:10.1038/s41598-024-69903-5), 2024-08-16
Supplement: 41598_2024_69903_MOESM1_ESM.pdf [file 41598_2024_69903_MOESM1_ESM.pdf]

Supplemental materials for: **Seasonal soil health dynamics in soy-wheat relay intercropping**

Jennifer B. Thompson, Thomas F. Döring, Timothy M. Bowles, Steffen Kolb, Sonoko Bellingrath-Kimura, Moritz Reckling

Corresponding author: Jennifer B. Thompson, [jennifer.thompson@zalf.de](mailto:jennifer.thompson@zalf.de)

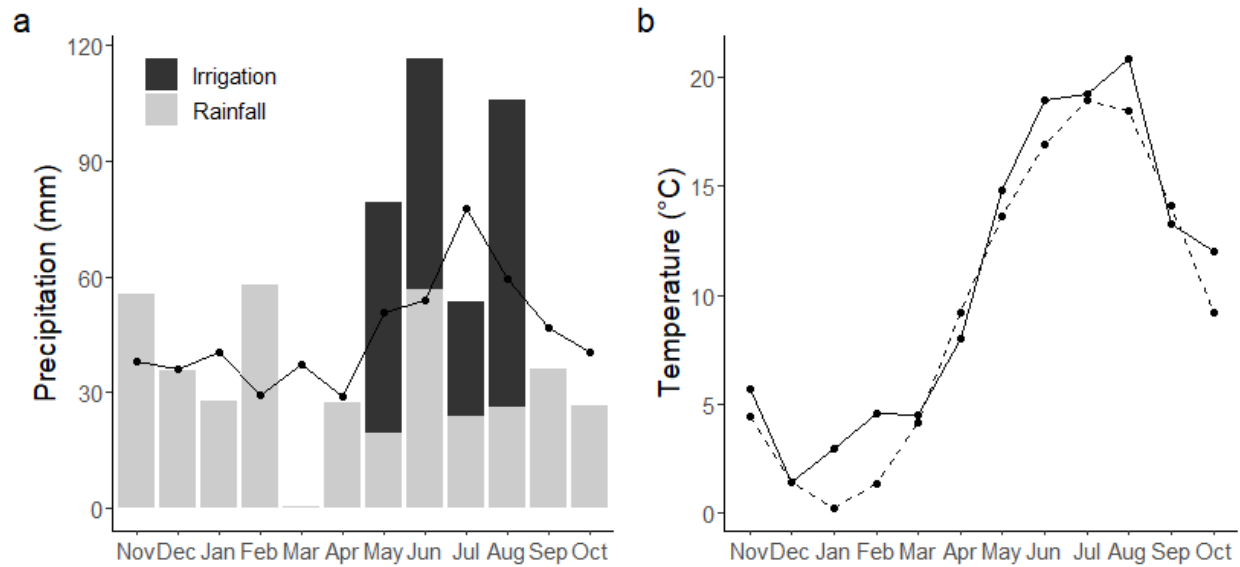

Figure S1 a) Precipitation and irrigation from November 2021-October 2022. The black line represents the historical rainfall average from 1990-2022, b) Average monthly temperatures from the 2021-2022 growing season (solid line) and the historical temperature average from 1990-2022 (dashed line).

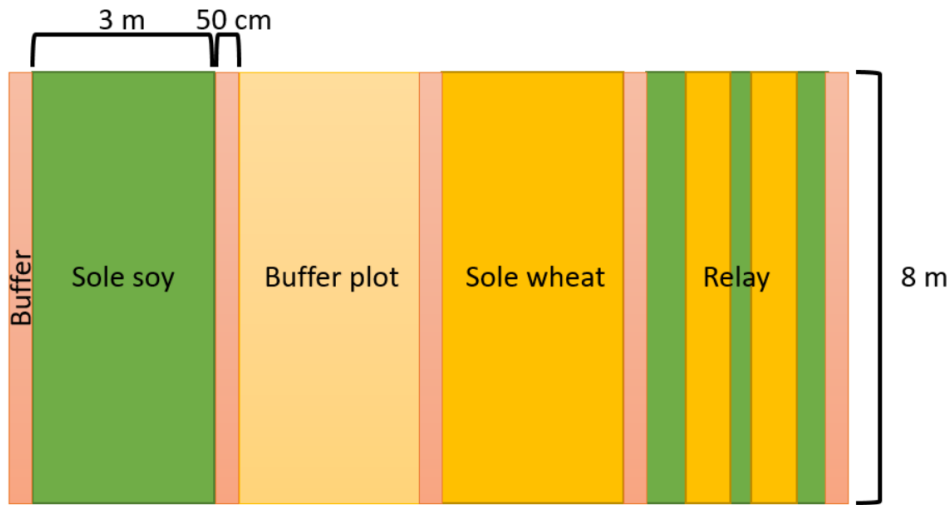

Figure S2. Example of the plot and buffer layout in one experimental block of the study. Blocks were replicated six times with plots randomly ordered throughout. Both the buffer and buffer plots were cultivated with winter wheat but received no management (i.e. fertilization, herbicides, etc).

Table S1 Management of the 3 cropping systems.

| <b>Practices</b>    | <b>Sole wheat</b>                                                                                                                                                           | <b>Soy-wheat relay intercropping</b>                                                                                                       | <b>Sole soy</b>                                                                                                                                                                                                       |
|---------------------|-----------------------------------------------------------------------------------------------------------------------------------------------------------------------------|--------------------------------------------------------------------------------------------------------------------------------------------|-----------------------------------------------------------------------------------------------------------------------------------------------------------------------------------------------------------------------|
| Tillage             | Previous crop rye. All plots plowed at a 23 cm soil depth with a mouldboard plough in early October                                                                         |                                                                                                                                            |                                                                                                                                                                                                                       |
| Seedbed preparation | Leveled to 10cm with a cultivator                                                                                                                                           |                                                                                                                                            | Cultivated to 5 cm                                                                                                                                                                                                    |
| Sowing              | 14.10.2021<br>Cereal drill                                                                                                                                                  | Same as sole crops<br>Cereal drill and direct drill                                                                                        | 29.04.22<br>Direct drill                                                                                                                                                                                              |
| Fertilization       | 60 kg/ha N, 14 kg/ha S in March. 40 kg/ha N, 10 kg/ha S in April<br><br>(N is a mix of urea, NH <sub>4</sub> <sup>+</sup> , and NO <sub>3</sub> )                           | 60 kg/ha N and 14 kg/ha S in March<br><br>*N fertilization was reduced compared to sole wheat for adjusted wheat density to avoid N losses | No fertilization                                                                                                                                                                                                      |
| Herbicides          | Carmina 640 (1.50 l/ha) was applied at BBCH 11 in a broth of 600 l/ha. The growth regulator Acucel (1.00 l/ha) was applied on the same plots in a 400 l/ha broth at BBCH 30 |                                                                                                                                            | Pre-emergence herbicides (Centium 36 CS 0.25 l/ha, Sencor Liquid 0.30 l/ha and Spectrum 0.60 l/ha) applied BBCH 03 in a 600 l/ha broth. Post emergence herbicide (Fusilade MAX, 2.00 l/ha) applied in 600 l/ha broth. |
| Harvest             | 21.07.2022                                                                                                                                                                  | Wheat: 21.07.22<br>Harvested with a FlexxiSelect combine header attachment (Flexxifinger).<br>Soy: 08.11.22                                | 12.10.2022                                                                                                                                                                                                            |

Table S2 Absolute values of carbon fractionation % C and %N from the final sampling point of each cropping system.

| <b>Treatment</b> | <b>MAOM %C</b> | <b>MAOM %N</b> | <b>MAOM C:N</b> | <b>POM %C</b> | <b>POM %N</b> | <b>POM C:N</b> |
|------------------|----------------|----------------|-----------------|---------------|---------------|----------------|
| Sole wheat       | 1.72           | 0.18           | 10.1            | 0.28          | 0.02          | 11.2           |
| Intercropping    | 1.85           | 0.18           | 10.4            | 0.32          | 0.03          | 10.8           |
| Sole soy         | 2.02           | 0.18           | 10.7            | 0.29          | 0.03          | 10.7           |

Table S3 Substrate group average well color development (AWCD) from ecoplates

| Sampling time | Treatment     | Amines & Amides | Amino acids | Carbo-hydrates | Carboxylic & Acetic acids | Polymers |
|---------------|---------------|-----------------|-------------|----------------|---------------------------|----------|
| 1             | Intercropping | 0.536           | 0.429       | 0.380          | 0.567                     | 0.401    |
|               | Sole soy      | 0.314           | 0.298       | 0.278          | 0.456                     | 0.428    |
|               | Sole wheat    | 0.370           | 0.514       | 0.897          | 0.788                     | 0.565    |
| 2             | Intercropping | 0.666           | 0.520       | 0.390          | 0.808                     | 0.587    |
|               | Sole soy      | 0.368           | 0.3449      | 0.468          | 0.601                     | 0.528    |
|               | Sole wheat    | 0.557           | 0.376       | 0.361          | 0.627                     | 0.408    |
| 3             | Intercropping | 0.761           | 0.596       | 0.675          | 0.834                     | 0.789    |
|               | Sole soy      | 0.570           | 0.612       | 0.529          | 0.804                     | 0.648    |
|               | Sole wheat    | 0.637           | 0.602       | 0.741          | 1.003                     | 0.752    |
| 4             | Intercropping | 0.602           | 0.402       | 0.567          | 0.428                     | 0.407    |
|               | Sole soy      | 0.525           | 0.278       | 0.496          | 0.346                     | 0.350    |
|               | Sole wheat    | 0.470           | 0.372       | 0.579          | 0.523                     | 0.521    |
| 5             | Intercropping | 0.362           | 0.278       | 0.566          | 0.568                     | 0.381    |
|               | Sole soy      | 0.475           | 0.252       | 0.433          | 0.284                     | 0.348    |
|               | Sole wheat    | 0.357           | 0.323       | 0.558          | 0.515                     | 0.405    |

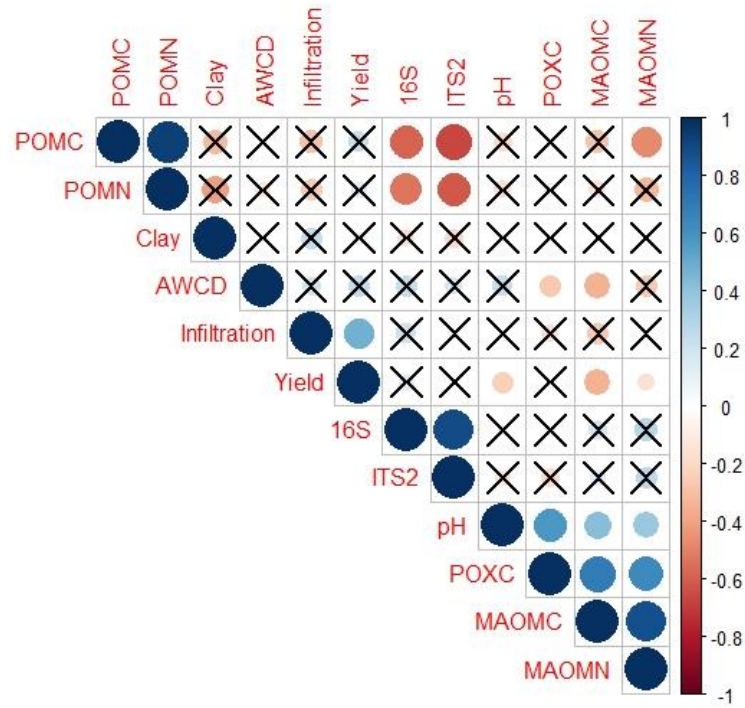

Figure S3 Pearson's correlations of soil health indicators and yield from Sampling 5. Non-significant relationships are crossed with an 'x' and only significant moderate ( $r > 0.35$ ) relationships are mentioned in the main text.
